# Supplementary material for: Molecular Identification of Endophytic Bacteria in Leucojum aestivum In Vitro Culture, NMR-Based Metabolomics Study and LC-MS Analysis Leading to Potential Amaryllidaceae Alkaloid Production
Source: PubMed Central journal article supplement (PMC7916811; doi:10.3390/ijms22041773), 2021-02-10
Supplement: ijms-22-01773-s001.pdf [file ijms-22-01773-s001.pdf]

## Supplementary materials

**Insertion S1:** Bacteria strains compared to isolated strain (*Bacillus* sp.) from *L. aestivum* in vitro bulblet.

The isolated strain from *L. aestivum* in vitro bulblet (highlighted by an orange arrow in the Figure 2 of the manuscript), has been compared to: R\_115334.1\_Bacillus\_pumilus\_strain\_CIP\_52.67,NR\_043242.1\_Bacillus\_pumilus\_strain\_ATCC\_7061,NR\_148786.1\_Bacillus\_zhangzhouensis\_strain\_MCCC\_1A08372,NR\_112637.1\_Bacillus\_pumilus\_strain\_NBRC\_12092,NR\_113945.1\_Bacillus\_safensis\_strain\_NBRC\_100820,NR\_041794.1\_Bacillus\_safensis\_FOZ6b,NR\_148787.1\_Bacillus\_australimaris\_strain\_MCCC\_1A05787,NR\_118441.1\_Bacillus\_stratosphericus\_strain\_41KF2a,NR\_042337.1\_Bacillus\_altitudinis\_41KF2b,NR\_042339.1\_Bacillus\_aerophilus\_strain\_28K,NR\_042336.1\_Bacillus\_stratosphericus\_strain\_41KF2a,NR\_118439.1\_Bacillus\_aerius\_strain\_24K,NR\_148244.1\_Bacillus\_xiamenensis\_strain\_MCCC\_1A00008,NR\_118381.1\_Bacillus\_pumilus\_strain\_SBMP2,NR\_043268.1\_Bacillus\_idriensis\_strain\_SMC\_43522,NR\_116191.1\_Bacillus\_pumilus\_strain\_NRRL\_NRS272,NR\_042538.1\_Salirhabdus\_euzebyi\_strain\_CVS14,NR\_116287.1\_Falsibacillus\_pallidus\_strain\_CW\_7,NR\_115578.1\_Bacillus\_benzoovorans\_strain\_DSM\_5391,NR\_157636.1\_Bacillus\_mangrovi\_strain\_AK61,NR\_102783.2\_Bacillus\_subtilis\_subsp.\_subtilis\_strain\_168,NR\_024696.1\_Bacillus\_vallismortis\_strain\_DSM\_11031,NR\_116022.1\_Bacillus\_amyloliquefaciens\_strain\_BCRC\_11601,NR\_116240.1\_Bacillus\_velezensis\_strain\_CBMB205,NR\_024817.1\_Bacillus\_asahii\_strain\_MA001,NR\_043334.1\_Bacillus\_niabensis\_strain\_4T19,NR\_125634.1\_Salinibacillus\_xinjiangensis\_strain\_J4,NR\_112685.1\_Bacillus\_amyloliquefaciens\_strain\_NBRC\_15535,NR\_113994.1\_Bacillus\_vallismortis\_strain\_NBRC\_101236,NR\_024689.1\_Bacillus\_atrophaeus\_strain\_JCM\_9070,NR\_146005.1\_Bacillus\_malikii\_strain\_NCCP662,NR\_151979.1\_Bacillus\_oryzisolii\_strain\_1DS310,NR\_112723.1\_Bacillus\_atrophaeus\_strain\_NBRC\_15539,NR\_117946.1\_Bacillus\_amyloliquefaciens\_strain\_MPA\_1034,NR\_041455.1\_Bacillus\_amyloliquefaciens\_strain\_NBRC\_15535,NR\_104919.1\_Bacillus\_tequilensis\_strain\_10b,NR\_117274.1\_Bacillus\_siamensis\_KCTC\_13613\_strain\_PDA10,NR\_157742.1\_Bacillus\_wudali\_anchiensis\_strain\_FJAT27215,NR\_042974.1\_Bacillus\_indicus\_strain\_JG30,NR\_042286.1\_Bacillus\_herbersteinensis\_strain\_D1,5,NR\_044828.1\_Bacillus\_benzoovorans\_strain\_NCIMB\_12555,NR\_029022.1\_Bacillus\_indicus\_strain\_Sd/3,NR\_118972.1\_Bacillus\_subtilis\_strain\_NCDO\_1769,NR\_027552.1\_Bacillus\_subtilis\_strain\_DSM\_10,NR\_075005.2\_Bacillus\_velezensis\_strain\_FZB42,NR\_112116.2\_Bacillus\_subtilis\_strain\_IAM\_12118,NR\_159904.1\_Bacillus\_lacus\_strain\_AK74,NR\_024931.1\_Bacillus\_subtilis\_subsp.\_spizizenii\_strain\_NRRL\_B23049,NR\_151897.1\_Bacillus\_nakamurai\_strain\_NRRL\_B41091,NR\_116017.1\_Bacillus\_subtilis\_strain\_BCRC\_10255,NR\_115063.1\_Bacillus\_halotolerans\_strain\_DSM\_8802,NR\_113265.1\_Bacillus\_subtilis\_strain\_JCM\_1465,NR\_115282.1\_Bacillus\_halotolerans\_strain\_CR95,NR\_112686.1\_Bacillus\_subtilis\_subsp.\_spizizenii\_strain\_NBRC\_101239,NR\_112629.1\_Bacillus\_subtilis\_strain\_NBRC\_13719,NR\_115931.1\_Bacillus\_halotolerans\_strain\_LMG\_22477,NR\_115930.1\_Bacillus\_halotolerans\_strain\_CECT\_5687,NR\_115929.1\_Bacillus\_halotolerans\_strain\_LMG\_22476,NR\_118290.1\_Bacillus\_mojavensis\_strain\_ifo\_15718,NR\_118456.1\_Quasibacillus\_thermotolerans\_strain\_SgZ8,NR\_043015.1\_Bacillus\_litoralis\_strain\_SW211,NR\_118950.1\_Bacillus\_amyloliquefaciens\_DSM\_7\_strain\_ATCC\_23350,NR\_157608.1\_Bacillus\_swezeyi\_strain\_NRRL\_B41294,NR\_024693.1\_Bacillus\_mojavensis\_strain\_IFO15718,NR\_115325.1\_Bacillus\_nematocida\_strain\_B16,NR\_104873.1\_Bacillus\_subtilis\_subsp.\_inaquosorum\_strain\_BGSC\_3A28,NR\_112725.1\_Bacillus\_mojavensis\_strain\_NBRC\_15718,NR\_159903.1\_Ornithinibacillus\_salinisoli\_strain\_LCB256,NR\_159145.1\_Salirhabdus\_salicampi\_strain\_BH128,NR\_132682.1\_Bacillus\_kyonggiensis\_strain\_NB22,NR\_044532.1\_Pontibacillus

us\_halophilus\_strain\_JSM\_076056,NR\_112632.1\_Bacillus\_circulans\_strain\_NBRC\_13626,NR\_043084 .1\_Bacillus\_koreensis\_strain\_BR030,NR\_041379.1\_Bacillus\_panaciterrae\_strain\_Gsoil\_1517,NR\_1581 07.1\_Bacillus\_endozanthoxylicus\_strain\_1404,NR\_109140.1\_Bacillus\_persicus\_strain\_B48,NR\_10456 6.1\_Bacillus\_circulans\_strain\_ATCC\_4513,NR\_117285.1\_Bacillus\_oceanisediminis\_strain\_H2,NR\_02 9057.1\_Macrocooccus\_lamae\_strain\_R\_16089,NR\_149779.1\_Bacillus\_loiseleuriae\_strain\_FJAT27997, NR\_146034.1\_Bacillus\_depressus\_strain\_BZ1,NR\_115877.1\_Bacillus\_canaveralius\_strain\_KSC\_SF8b ,NR\_133974.1\_Bacillus\_huizhouensis\_strain\_GSS03,NR\_125629.1\_Bacillus\_massilioanorexius\_AP8, NR\_109671.1\_Bacillus\_abyssalis\_strain\_SCSIO\_15042,NR\_036847.1\_Macrocooccus\_brunensis\_strain\_CCM\_4811,NR\_041641.1\_Bacillus\_azotoformans\_LMG\_9581,NR\_113993.1\_Bacillus\_sonorensis\_stra in\_NBRC\_101234,NR\_043700.1\_Oceanobacillus\_chironomi\_strain\_T3944D,NR\_108491.1\_Bacillus\_g ottheilii\_strain\_WCC\_4585,NR\_147397.1\_Bacillus\_marasmi\_strain\_MarseilleP3556,NR\_145585.1\_Ba cillus\_gossypii\_strain\_JM267,NR\_156041.1\_Bacillus\_maritimus\_strain\_KS169,NR\_148614.1\_Bacillus \_ectoiniformans\_strain\_NE14,NR\_125726.1\_Jeotgalibacillus\_soli\_strain\_P9,>NR\_117927.1\_Ornithini bacillus\_scapharcae\_TW25,NR\_148280.1\_Bacillus\_cihuensis\_strain\_FJAT14515,NR\_043267.1\_Bacill us\_infantis\_strain\_SMC\_43521,NR\_109068.1\_Bacillus\_ginsengisoli\_strain\_DCY53,NR\_028709.1\_Bac illus\_siralis\_strain\_171544 The evolutionary history was inferred by using the Maximum Likelihood method and Tamura-Nei model [1]. Evolutionary analyses were conducted in MEGA X [2].

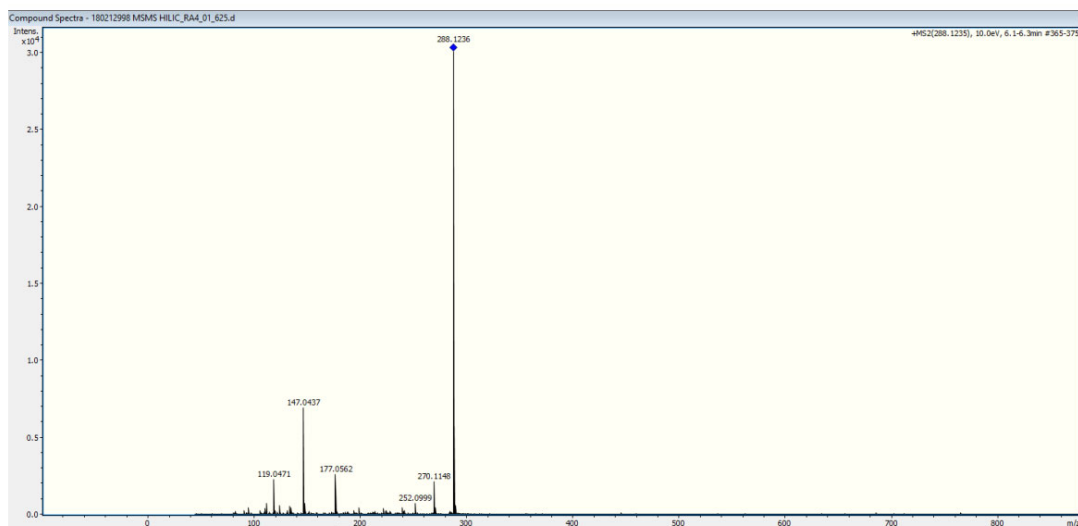

**Figure S1.** MSMS of lycorine derived from endophytic *Bacillus* sp. isolated from *L. aestivum* in vitro bulblet.

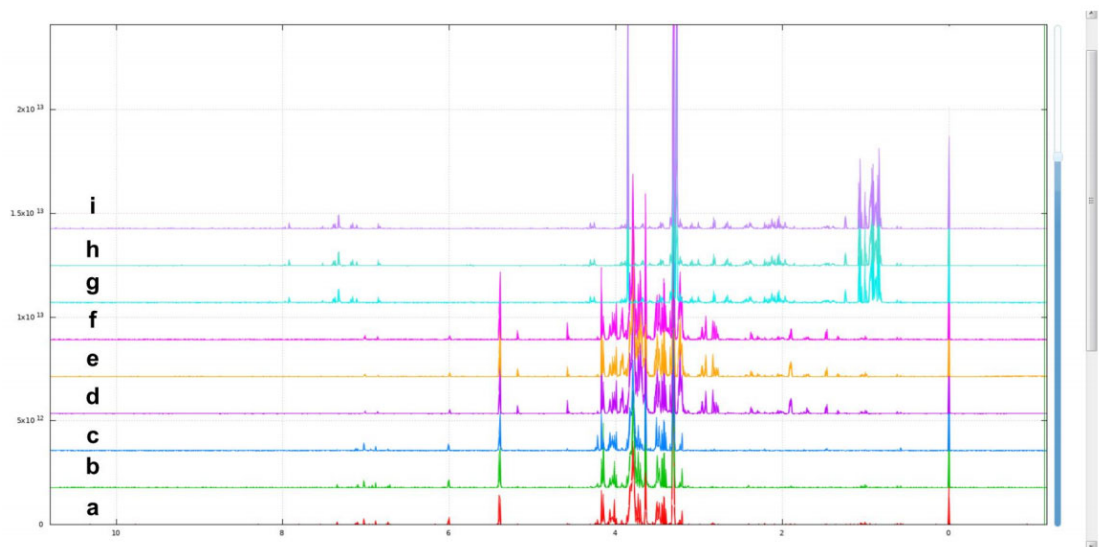

**Figure S2.** <sup>1</sup>H NMR Spectra in NMRProcFlow. *Leucojum aestivum* in vivo bulb (spectra a, b, c); *Leucojum aestivum* in vitro bulblets (spectra d, e, f), *Bacillus* sp. (spectra g,h, i).

### References

1. Tamura, K.; Nei, M. Estimation of the number of nucleotide substitutions in the control region of mitochondrial DNA in humans and chimpanzees. *Mol. Biol. Evol.* **1993**, *10*, 512–526, doi:10.1093/oxfordjournals.molbev.a040023.
2. Kumar, S.; Stecher, G.; Li, M.; Knyaz, C.; Tamura, K. MEGA X: Molecular Evolutionary Genetics Analysis across Computing Platforms. *Mol. Biol. Evol.* **2018**, *35*, 1547–1549, doi:10.1093/molbev/msy096.
